# Supplementary material for: Discrimination of Four Cinnamomum Species with Physico-Functional Properties and Chemometric Techniques: Application of PCA and MDA Models
Source: MDPI journal article supplement (doi:10.3390/foods10112871), 2021-11-19
Supplement: s1 [file s1]

**Table S1.** Detailed information on the *Cinnamomum* samples used in the study.

| Sample no. | Species             | Collected location               | Collected year |
|------------|---------------------|----------------------------------|----------------|
| 1          | <i>C. verum</i>     | Uswetakeyyawa Wattala, Sri Lanka | 2018           |
| 2          |                     | Dambulla, Sri Lanka              | 2020           |
| 3          |                     | Dambulla, Sri Lanka              | 2020           |
| 4          |                     | Kerala, India                    | 2018           |
| 5          |                     | Kerala, India                    | 2018           |
| 6          |                     | Kerala, India                    | 2018           |
| 7          | <i>C. burmannii</i> | East Java, Indonesia             | 2019           |
| 8          |                     | East Java, Indonesia             | 2019           |
| 9          |                     | East Java, Indonesia             | 2018           |
| 10         |                     | East Java, Indonesia             | 2018           |
| 11         |                     | South Jakarta, Indonesia         | 2019           |
| 12         |                     | South Jakarta, Indonesia         | 2019           |
| 13         | <i>C. loureiroi</i> | Vietnam                          | 2019           |
| 14         |                     | Vietnam                          | 2019           |
| 15         |                     | Ho Chi Minh City, Vietnam        | 2018           |
| 16         |                     | Ho Chi Minh City, Vietnam        | 2020           |
| 17         | <i>C. cassia</i>    | Tainan, Taiwan                   | 2018           |
| 18         |                     | Tainan, Taiwan                   | 2018           |
| 19         |                     | Tainan, Taiwan                   | 2019           |
| 20         |                     | Tainan, Taiwan                   | 2019           |

**Table S2.** Independent samples *t*-test results of the nine selected discriminative physico-functional variables.

| Variables               | <i>Cinnamomum</i> species |      |                     |      |                        |          |                     |      |                  |      |                        |          |
|-------------------------|---------------------------|------|---------------------|------|------------------------|----------|---------------------|------|------------------|------|------------------------|----------|
|                         | Group 1                   |      |                     |      |                        |          | Group 2             |      |                  |      |                        |          |
|                         | <i>C. verum</i>           |      | <i>C. burmannii</i> |      | <i>t</i> -test results |          | <i>C. loureiroi</i> |      | <i>C. cassia</i> |      | <i>t</i> -test results |          |
|                         | Mean                      | SD   | Mean                | SD   | <i>t</i>               | <i>p</i> | Mean                | SD   | Mean             | SD   | <i>t</i>               | <i>p</i> |
| <b>BD</b>               | 0.35                      | 0.02 | 0.45                | 0.05 | -10.557                | 0.000    | 0.34                | 0.01 | 0.33             | 0.02 | 3.376                  | 0.002    |
| <b>True density</b>     | 1.51                      | 0.00 | 1.49                | 0.01 | 15.704                 | 0.000    | 1.48                | 0.01 | 1.46             | 0.02 | 2.746                  | 0.010    |
| <b>Porosity</b>         | 76.49                     | 1.01 | 69.76               | 3.58 | 10.845                 | 0.000    | 76.71               | 0.73 | 77.40            | 1.01 | -2.746                 | 0.009    |
| <b>pH</b>               | 4.73                      | 0.24 | 4.90                | 0.10 | -3.914                 | 0.000    | 4.93                | 0.09 | 5.04             | 0.17 | -2.731                 | 0.010    |
| <b>Moisture content</b> | 9.89                      | 0.44 | 11.15               | 0.40 | -12.719                | 0.000    | 10.80               | 0.50 | 11.63            | 0.67 | -4.870                 | 0.000    |
| <b>Color</b>            | 3.85                      | 0.78 | 7.89                | 1.14 | -17.496                | 0.000    | 5.76                | 0.58 | 3.28             | 0.36 | 17.873                 | 0.000    |
| <b>WAI</b>              | 3.78                      | 0.20 | 5.18                | 0.82 | -10.002                | 0.000    | 3.09                | 0.17 | 2.93             | 0.19 | 2.873                  | 0.006    |
| <b>WSI</b>              | 5.61                      | 1.90 | 7.89                | 2.66 | -4.184                 | 0.000    | 8.63                | 0.44 | 7.83             | 1.12 | 3.257                  | 0.003    |
| <b>SP</b>               | 4.56                      | 0.17 | 8.93                | 2.02 | -12.908                | 0.000    | 3.53                | 0.25 | 3.05             | 0.19 | 7.465                  | 0.000    |

The significant ( $p < 0.05$ ) physico-functional variables were selected based on selected two groups [(CV and CB)  $\cap$  (CL and CC)].

BD: bulk density; WAI: water absorption index; WSI: water solubility index; SP: swelling power.

**Table S3.** MANOVA results of *Cinnamomum* species using nine physico-functional variables.

| Test               | Value | F- value | Hypothesis df | Error df | p-value |
|--------------------|-------|----------|---------------|----------|---------|
| Pillai's trace     | 2.45  | 54.65    | 27            | 330      | 0.000   |
| Wilks' $\Lambda$   | 0.00  | 84.52    | 27            | 316.06   | 0.000   |
| Hotelling's trace  | 27.45 | 108.44   | 27            | 320      | 0.000   |
| Roy's largest root | 15.72 | 192.12   | 9             | 110      | 0.000   |

Wilks'  $\Lambda$ : Wilks' lambda

**Table S4.** Total variance explained and principal component loading matrix.

|                                 | Principal components |              |             |
|---------------------------------|----------------------|--------------|-------------|
|                                 | PC1                  | PC2          | PC3         |
| <i>Total Variance explained</i> |                      |              |             |
| Eigenvalue                      | 4.20                 | 1.93         | 1.22        |
| % Variance                      | 46.69                | 21.49        | 13.51       |
| Cumulative %                    | 46.69                | 68.18        | 81.70       |
| <i>Variable loading</i>         |                      |              |             |
| BD                              | <b>0.94</b>          | 0.06         | -0.21       |
| True density                    | 0.18                 | <b>-0.82</b> | -0.20       |
| Porosity                        | <b>-0.93</b>         | -0.13        | 0.19        |
| pH                              | -0.01                | <b>0.61</b>  | -0.07       |
| Moisture content                | 0.15                 | <b>0.88</b>  | 0.17        |
| Color                           | <b>0.88</b>          | 0.08         | 0.29        |
| WAI                             | <b>0.91</b>          | -0.20        | -0.08       |
| WSI                             | -0.01                | 0.61         | <b>0.96</b> |
| SP                              | <b>0.90</b>          | -0.13        | 0.22        |

The high loadings are in bold.

BD: bulk density; WAI: water absorption index; WSI: water solubility index; SP: swelling power.

**Table S5.** Stepwise DA characteristics of *Cinnamomum* species using nine physico-functional variables.

| DF | Eigenvalue | % Variance | Cumulative % | Canonical correlation | Wilks' $\Lambda$ | $\chi^2$ value | df | p-value |
|----|------------|------------|--------------|-----------------------|------------------|----------------|----|---------|
| 1  | 10.89      | 60.30      | 60.30        | 0.96                  | 0.10             | 443.66         | 9  | 0.000   |
| 2  | 7.08       | 39.20      | 99.50        | 0.94                  | 0.11             | 207.26         | 4  | 0.000   |
| 3  | 0.09       | 0.50       | 100.00       | 0.28                  | 0.92             | 7.78           | 1  | 0.005   |

DF: discriminant function; df: degree of freedom; Wilks'  $\Lambda$ : Wilks' lambda;  $\chi^2$ : Chi-square.

**Table S6.** Prediction result of the testing set by the MDA model.

| Sample | Actual species | Values of linear discriminant functions |              |              |              | Predicted species |
|--------|----------------|-----------------------------------------|--------------|--------------|--------------|-------------------|
|        |                | CV                                      | CB           | CL           | CC           |                   |
| 1      | CV             | <b>9.88</b>                             | -22.41       | -9.26        | -23.18       | CV                |
| 2      | CV             | <b>8.29</b>                             | -22.74       | -8.54        | -20.89       | CV                |
| 3      | CV             | <b>11.33</b>                            | -24.77       | -8.96        | -22.12       | CV                |
| 4      | CV             | <b>12.34</b>                            | -29.65       | -8.06        | -17.08       | CV                |
| 5      | CV             | <b>7.54</b>                             | -24.28       | -7.74        | -18.13       | CV                |
| 6      | CV             | <b>9.60</b>                             | -29.81       | -6.74        | -13.86       | CV                |
| 7      | CB             | -21.49                                  | <b>15.58</b> | -11.76       | -29.84       | CB                |
| 8      | CB             | -32.68                                  | <b>15.20</b> | -5.71        | -17.79       | CB                |
| 9      | CB             | -19.27                                  | <b>-2.51</b> | -4.44        | -12.85       | CB                |
| 10     | CB             | -17.57                                  | <b>5.45</b>  | -9.08        | -23.10       | CB                |
| 11     | CB             | -21.46                                  | <b>15.22</b> | -13.08       | -27.98       | CB                |
| 12     | CB             | -17.99                                  | <b>8.68</b>  | -11.42       | -25.03       | CB                |
| 13     | CL             | -7.67                                   | -19.76       | <b>-1.83</b> | -7.15        | CL                |
| 14     | CL             | -13.39                                  | -17.11       | <b>-0.15</b> | -3.93        | CL                |
| 15     | CL             | -8.99                                   | -17.42       | <b>-2.15</b> | -8.36        | CL                |
| 16     | CL             | -12.56                                  | -18.45       | <b>0.04</b>  | -3.36        | CL                |
| 17     | CC             | -22.11                                  | -20.02       | 5.42         | <b>8.65</b>  | CC                |
| 18     | CC             | -17.02                                  | -21.57       | 3.51         | <b>4.96</b>  | CC                |
| 19     | CC             | -15.31                                  | -26.46       | 4.71         | <b>8.59</b>  | CC                |
| 20     | CC             | -33.88                                  | -18.32       | 10.68        | <b>19.20</b> | CC                |

The functions with larger values are in bold.
