# Supplementary material for: Discrimination of Four Cinnamomum Species with Physico-Functional Properties and Chemometric Techniques: Application of PCA and MDA Models
Source: MDPI journal article supplement (doi:10.3390/foods10112871), 2021-11-19
Supplement: s1 [file s1]

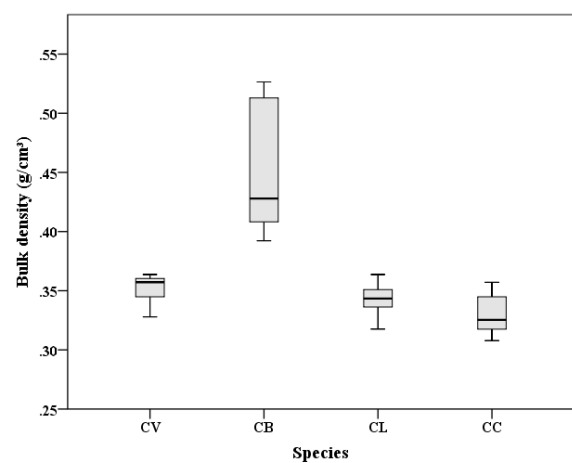

(a)

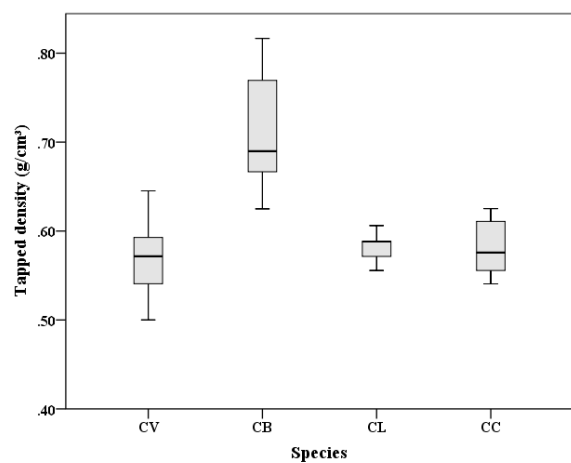

(b)

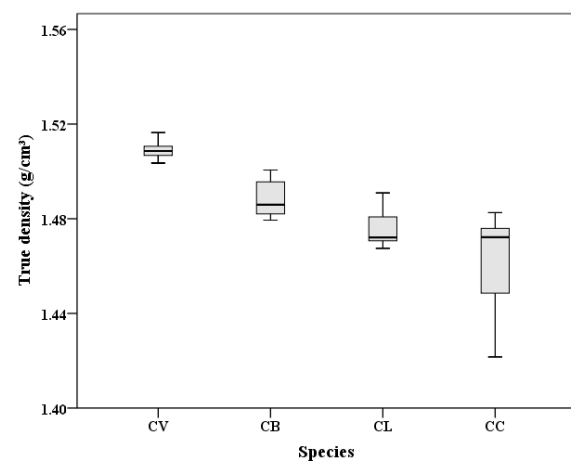

(c)

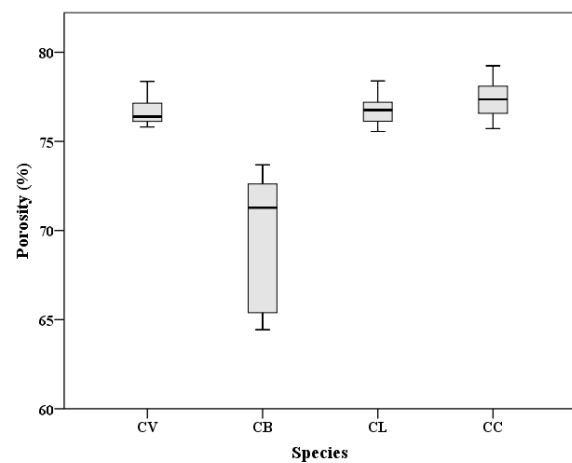

(d)

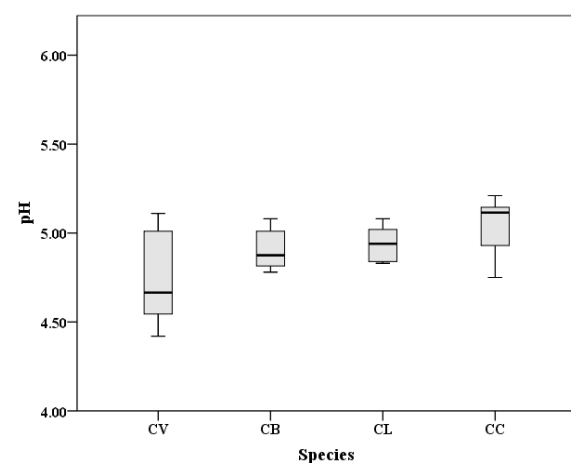

(e)

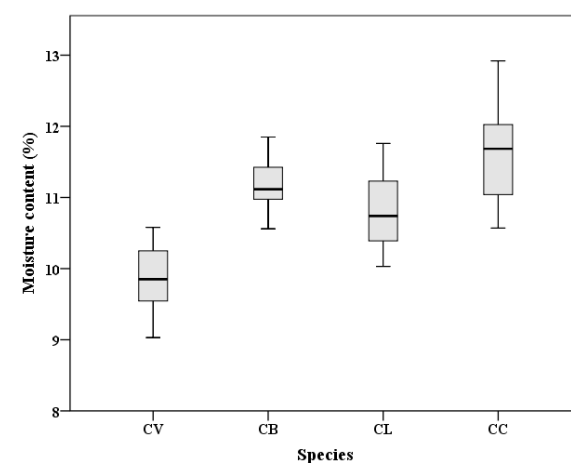

(f)

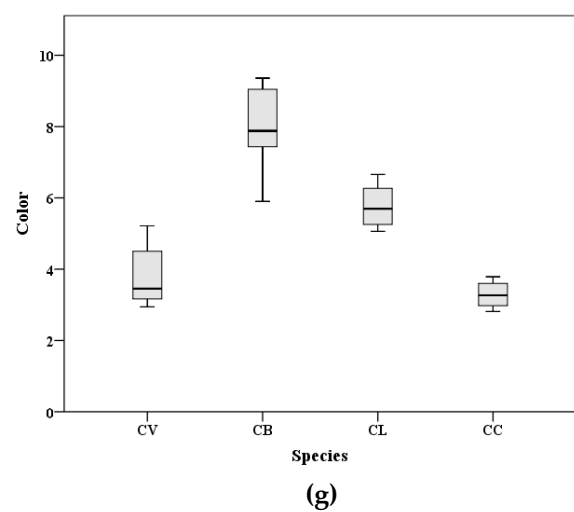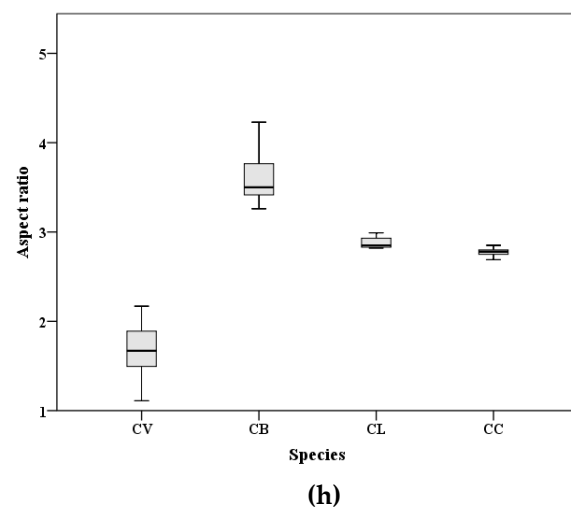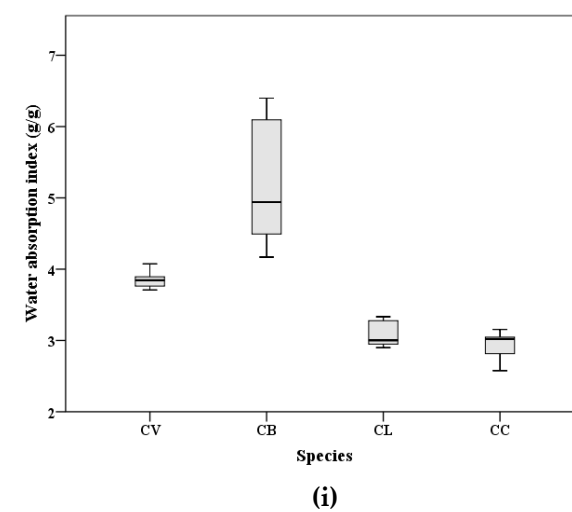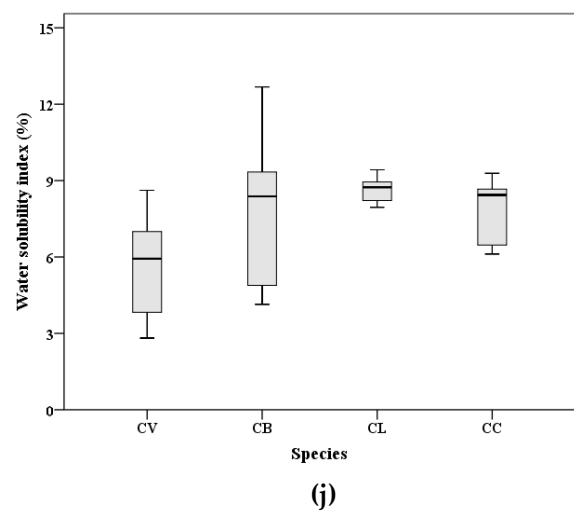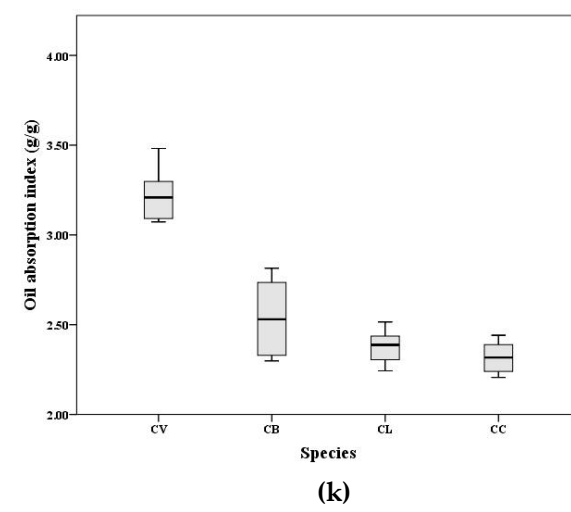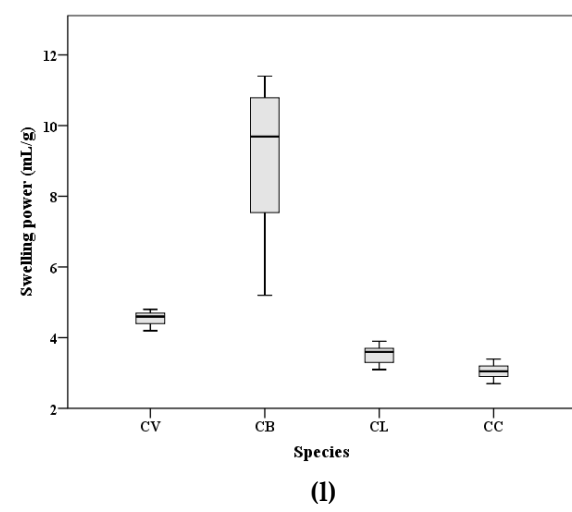

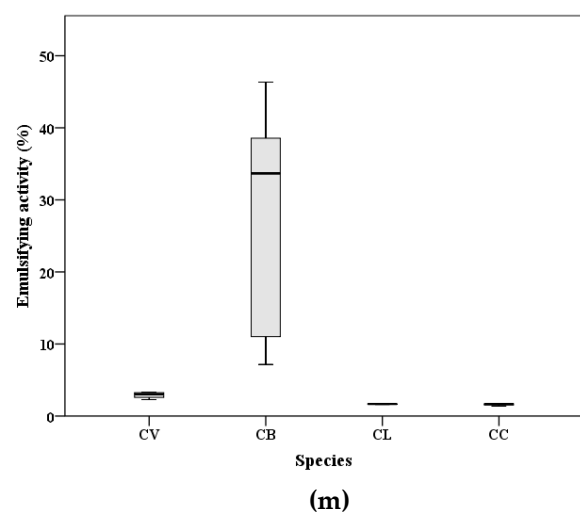

**Figure S1.** Box-and-whisker plots representing different physico-functional properties for the studied *Cinnamomum* species: **(a)** bulk density, **(b)** tapped density, **(c)** true density, **(d)** porosity, **(e)** pH, **(f)** moisture content, **(g)** color, **(h)** aspect ratio, **(i)** water absorption index, **(j)** water solubility index, **(k)** oil absorption index, **(l)** swelling power, and **(m)** emulsifying activity. CV: *C. verum*, CB: *C. burmannii*, CL: *C. loureiroi*, and CC: *C. cassia*.
